# Supplementary material for: Distinct pattern of one-carbon metabolism, a nutrient-sensitive pathway, in invasive breast cancer: A metabolomic study
Source: PubMed Central journal article supplement (PMC7210010; doi:10.18632/oncotarget.27575), 2020-05-05
Supplement: oncotarget-11-1637-s001.pdf [file oncotarget-11-1637-s001.pdf]

## Distinct pattern of one-carbon metabolism, a nutrient-sensitive pathway, in invasive breast cancer: A metabolomic study

### SUPPLEMENTARY MATERIALS

#### SUPPLEMENTARY MATERIAL 1

##### PLS-DA cross validation details:

| Measure  | 1 comps | 2 comps | 3 comps | 4 comps | 5 comps |
|----------|---------|---------|---------|---------|---------|
| Accuracy | 0.94667 | 0.96333 | 0.96667 | 0.99    | 0.98667 |
| R2       | 0.76411 | 0.82589 | 0.87762 | 0.91483 | 0.93106 |
| Q2       | 0.72939 | 0.77135 | 0.80968 | 0.82294 | 0.82489 |

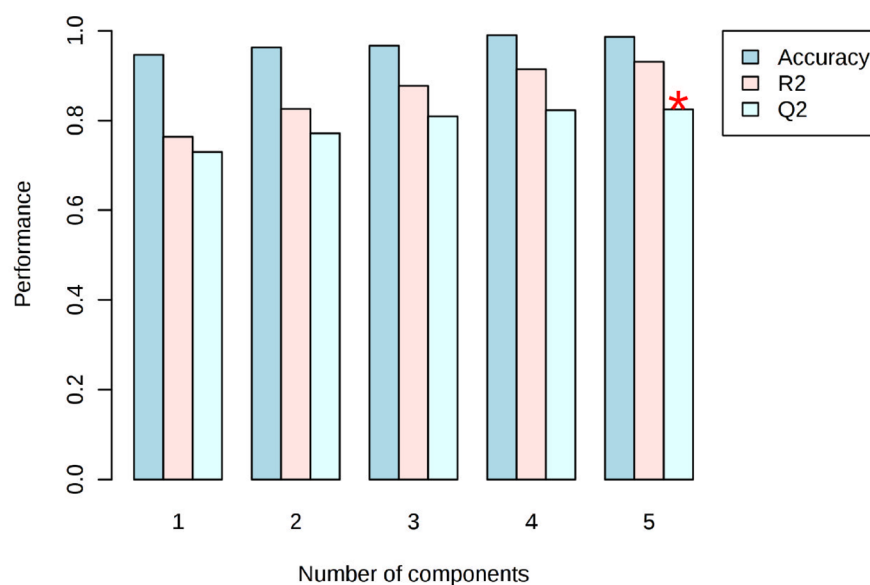

**Supplementary Figure 1: Q2 is an estimate of the predictive ability of the model and is calculated via cross-validation (CV).** In each CV, the predicted data are compared with the original data, and the sum of squared errors is calculated. The prediction error is then summed over all samples (Predicted Residual Sum of Squares or PRESS). For convenience, the PRESS is divided by the initial sum of squares and subtracted from 1 to resemble the scale of the R2. Good predictions have high Q2, as noted in our figure.

**Supplementary Table 1: Tissue metabolites differentiating breast cancer tissue from non-tumor adjacent breast tissue.** Differential 99 metabolites identified using LC-MS/MS. See Supplementary Table 1

**Supplementary Table 2: Detailed Metabolite Set Enrichment Analysis (MSEA) including all the 55 identified pathways in IDC**

| #  | Pathway                                                                     | Hits | Expect | P value | FDR   |
|----|-----------------------------------------------------------------------------|------|--------|---------|-------|
| 1  | Ammonia Recycling                                                           | 32   | 8      | 2.06    | 0.058 |
| 2  | Urea Cycle                                                                  | 29   | 7      | 1.87    | 0.163 |
| 3  | Aspartate Metabolism                                                        | 35   | 7      | 2.26    | 0.51  |
| 4  | Glycine and Serine Metabolism                                               | 59   | 9      | 3.8     | 0.987 |
| 5  | Carnitine Synthesis                                                         | 22   | 5      | 1.42    | 1.0   |
| 6  | Arginine and Proline Metabolism                                             | 53   | 8      | 3.42    | 1.0   |
| 7  | Alanine Metabolism                                                          | 17   | 4      | 1.1     | 1.0   |
| 8  | Oxidation of Branched Chain Fatty Acids                                     | 26   | 5      | 1.68    | 1.0   |
| 9  | Malate-Aspartate Shuttle                                                    | 10   | 3      | 0.645   | 1.0   |
| 10 | Spermidine and Spermine Biosynthesis                                        | 18   | 4      | 1.16    | 1.0   |
| 11 | Glutamate Metabolism                                                        | 49   | 7      | 3.16    | 1.0   |
| 12 | Glucose-Alanine Cycle                                                       | 13   | 3      | 0.838   | 1.0   |
| 13 | Methionine Metabolism                                                       | 43   | 6      | 2.77    | 1.0   |
| 14 | Phenylalanine and Tyrosine Metabolism                                       | 28   | 4      | 1.8     | 1.0   |
| 15 | Glutathione Metabolism                                                      | 21   | 3      | 1.35    | 1.0   |
| 16 | Beta-Alanine Metabolism                                                     | 34   | 4      | 2.19    | 1.0   |
| 17 | Valine, Leucine and Isoleucine Degradation                                  | 60   | 6      | 3.87    | 1.0   |
| 18 | Methylhistidine Metabolism                                                  | 4    | 1      | 0.258   | 1.0   |
| 19 | Beta Oxidation of Very Long Chain Fatty Acids                               | 17   | 2      | 1.1     | 1.0   |
| 20 | Lysine Degradation                                                          | 30   | 3      | 1.93    | 1.0   |
| 21 | Warburg Effect                                                              | 58   | 5      | 3.74    | 1.0   |
| 22 | Tryptophan Metabolism                                                       | 60   | 5      | 3.87    | 1.0   |
| 23 | Biotin Metabolism                                                           | 8    | 1      | 0.516   | 1.0   |
| 24 | Homocysteine Degradation                                                    | 9    | 1      | 0.58    | 1.0   |
| 25 | Phenylacetate Metabolism                                                    | 9    | 1      | 0.58    | 1.0   |
| 26 | Cysteine Metabolism                                                         | 26   | 2      | 1.68    | 1.0   |
| 27 | Phytanic Acid Peroxisomal Oxidation                                         | 26   | 2      | 1.68    | 1.0   |
| 28 | Propanoate Metabolism                                                       | 42   | 3      | 2.71    | 1.0   |
| 29 | Mitochondrial Beta-Oxidation of Long Chain Saturated Fatty Acids            | 28   | 2      | 1.8     | 1.0   |
| 30 | Selenoamino Acid Metabolism                                                 | 28   | 2      | 1.8     | 1.0   |
| 31 | Phosphatidylethanolamine Biosynthesis * endocanabionoides - imunossupressão | 12   | 1      | 0.773   | 1.0   |
| 32 | Taurine and Hypotaurine Metabolism                                          | 12   | 1      | 0.773   | 1.0   |
| 33 | Ketone Body Metabolism                                                      | 13   | 1      | 0.838   | 1.0   |
| 34 | Thyroid hormone synthesis                                                   | 13   | 1      | 0.838   | 1.0   |
| 35 | Citric Acid Cycle                                                           | 32   | 2      | 2.06    | 1.0   |
| 36 | Amino Sugar Metabolism                                                      | 33   | 2      | 2.13    | 1.0   |
| 37 | Gluconeogenesis                                                             | 35   | 2      | 2.26    | 1.0   |
| 38 | Tyrosine Metabolism                                                         | 72   | 4      | 4.64    | 1.0   |
| 39 | Nicotinate and Nicotinamide Metabolism                                      | 37   | 2      | 2.38    | 1.0   |
| 40 | Purine Metabolism                                                           | 74   | 4      | 4.77    | 1.0   |
| 41 | Butyrate Metabolism                                                         | 19   | 1      | 1.22    | 1.0   |
| 42 | Mitochondrial Electron Transport Chain                                      | 19   | 1      | 1.22    | 1.0   |
| 43 | Catecholamine Biosynthesis                                                  | 20   | 1      | 1.29    | 1.0   |
| 44 | Threonine and 2-Oxobutanoate Degradation                                    | 20   | 1      | 1.29    | 1.0   |
| 45 | Betaine Metabolism                                                          | 21   | 1      | 1.35    | 1.0   |
| 46 | Fatty acid Metabolism                                                       | 43   | 2      | 2.77    | 1.0   |
| 47 | Histidine Metabolism                                                        | 43   | 2      | 2.77    | 1.0   |
| 48 | Mitochondrial Beta-Oxidation of Short Chain Saturated Fatty Acids           | 27   | 1      | 1.74    | 1.0   |
| 49 | Folate Metabolism                                                           | 29   | 1      | 1.87    | 1.0   |
| 50 | Porphyrin Metabolism                                                        | 40   | 1      | 2.58    | 1.0   |
| 51 | Sphingolipid Metabolism                                                     | 40   | 1      | 2.58    | 1.0   |
| 52 | Bile Acid Biosynthesis                                                      | 65   | 2      | 4.19    | 1.0   |
| 53 | Pyruvate Metabolism                                                         | 48   | 1      | 3.09    | 1.0   |
| 54 | Pyrimidine Metabolism                                                       | 59   | 1      | 3.8     | 1.0   |
| 55 | Arachidonic Acid Metabolism                                                 | 69   | 1      | 4.45    | 1.0   |

Legend: HITS: actually matched number from the data; Expected: number of metabolites expected for metabolic pathway; P value: p values obtained after performing t-test (p-value<0.05); FDR: value obtained after performing false discovery test.

**Supplementary Table 3: Clinical pathological characteristics IDC patients**

|                           | <b>BREAST CANCER PACIENTS (N = 90)</b> |
|---------------------------|----------------------------------------|
| <b>AGE</b>                | <b>55 (median)</b>                     |
| <b>Menopause status</b>   |                                        |
| <b>Peri</b>               | 4                                      |
| <b>yes</b>                | 51                                     |
| <b>no</b>                 | 35                                     |
| <b>FAMILY HISTORY</b>     |                                        |
| <b>yes</b>                | 28                                     |
| <b>no</b>                 | 62                                     |
| <b>subtype</b>            |                                        |
| <b>LUMINAL B-HER2</b>     | 10                                     |
| <b>LUMINAL A</b>          | 47                                     |
| <b>LUMINAL B</b>          | 5                                      |
| <b>HER2</b>               | 8                                      |
| <b>NEGATIVE TRIPLE</b>    | 20                                     |
| <b>tumor size (MM)</b>    |                                        |
| <b>5-19</b>               | 31                                     |
| <b>20-49</b>              | 48                                     |
| <b>50+</b>                | 6                                      |
| <b>date not collected</b> | 5                                      |
| <b>GRADE</b>              |                                        |
| <b>I</b>                  | 0                                      |
| <b>II</b>                 | 22                                     |
| <b>III</b>                | 68                                     |
| <b>MITOTIC INDEX</b>      |                                        |
| <b>1</b>                  | 18                                     |
| <b>2</b>                  | 20                                     |
| <b>3</b>                  | 52                                     |
| <b>cOMMON LYMPHONOD</b>   |                                        |
| <b>pN0</b>                | 33                                     |
| <b>pN1</b>                | 43                                     |
| <b>pN2</b>                | 14                                     |
| <b>DATE NOT COLLECTED</b> | 2                                      |

**Supplementary Table 4: Biocrates' targeted metabolomics approach kits immediate identification of more than 630 endogenous metabolites of different classes, measurement of their absolute concentrations. See Supplementary Table 4**

## **SUPPLEMENTARY MATERIAL 2**

See Supplementary Material 2

### SUPPLEMENTARY MATERIAL 3

Principal component analysis (PCA) and Partial Least Squares Discriminant Analysis (PLS-DA), heatmap, and differentially expressed metabolites were performed after Pareto normalization to the raw data. Student's T-test was applied when comparing between surrounding ( $n = 42$ ) and tumor ( $n = 47$ ). Adjusted p values were obtained applying the false discovery rate (FDR) method (Benjamini & Hochberg). The data was considered

significant when  $FDR \leq 0.05$  and  $\log_2 FC \geq 2$ . R v3.5.1 was used to run analysis; graphics were generated by the following R packages: ggplot2, and "heatmap".

### REFERENCES

- Grace SC, Hudson DA. Processing and visualization of metabolomics data using R. Fundamentals and Applications. 2016. <https://doi.org/10.5772/65405>.

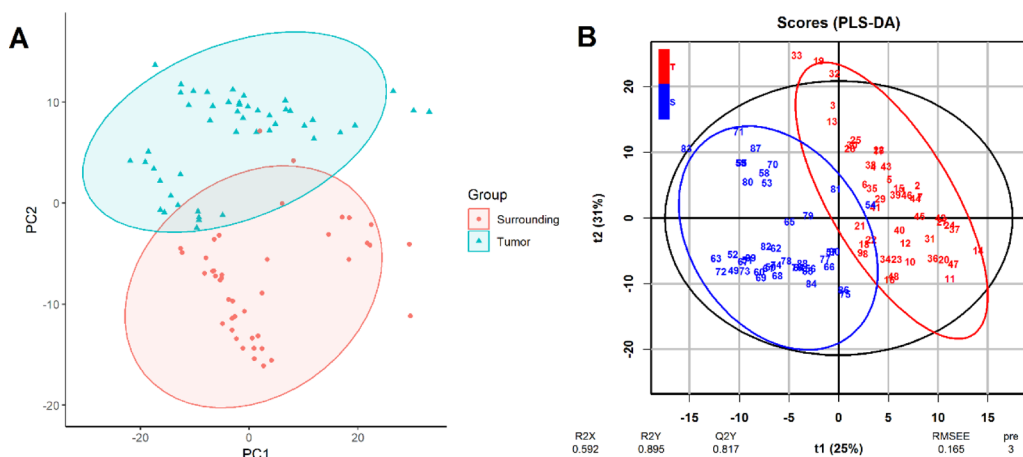

**Supplementary Figure 1: Distinct one-carbon metabolites from surrounding normal and tumor.** (A) Principal component analysis (PCA) from metabolites obtained from the surrounding (red) and tumor (blue) samples. (B) Partial Least Squares Discriminant Analysis (PLS-DA) identifies the tumor (tumor) and surrounding normal tissue (red).

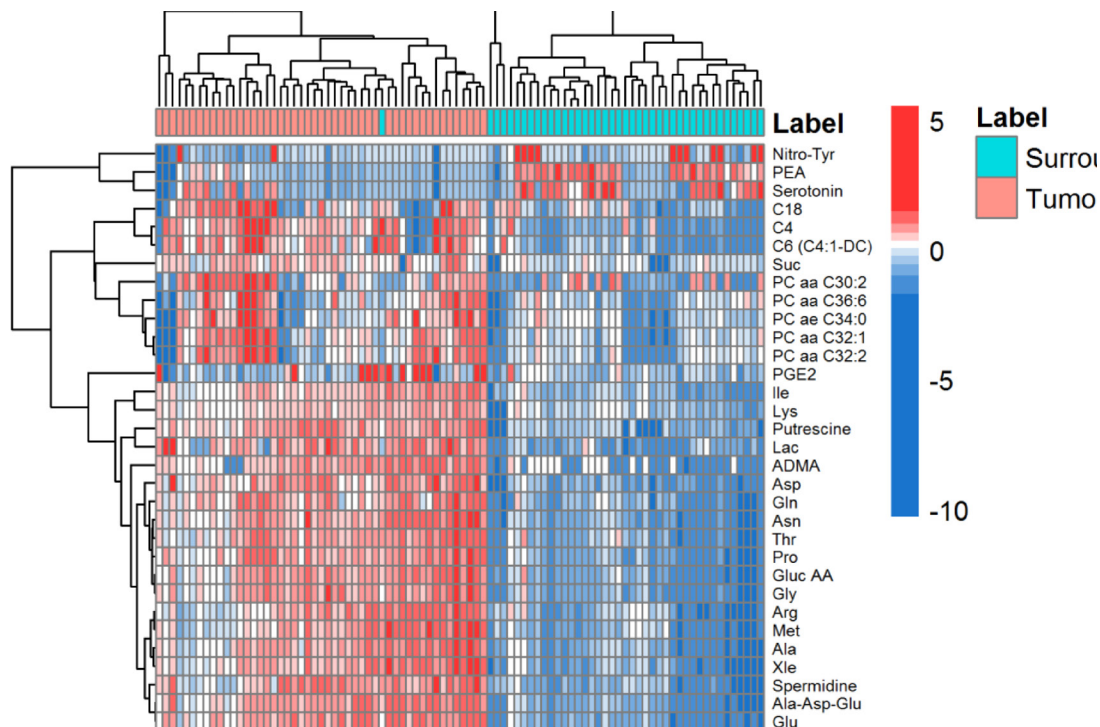

**Supplementary Figure 2: Differentially expressed metabolites between surrounding tissue and tumor from breast cancer patients.** Normal adjacent tumor metabolites are very different from tumor metabolites. Dendrograms were built based on Pearson correlation test. Only top differentially expressed metabolites are depicted ( $FDR < 0.05$ ,  $\log_2\text{FoldChange} > 2$ ).
